# Supplementary material
Source: PubMed Central journal article supplement (PMC5328552)
Supplement: AAC.02413-16_zac003175998s1.pdf [file AAC.02413-16_zac003175998s1.pdf]

IMP = 0 mg/L

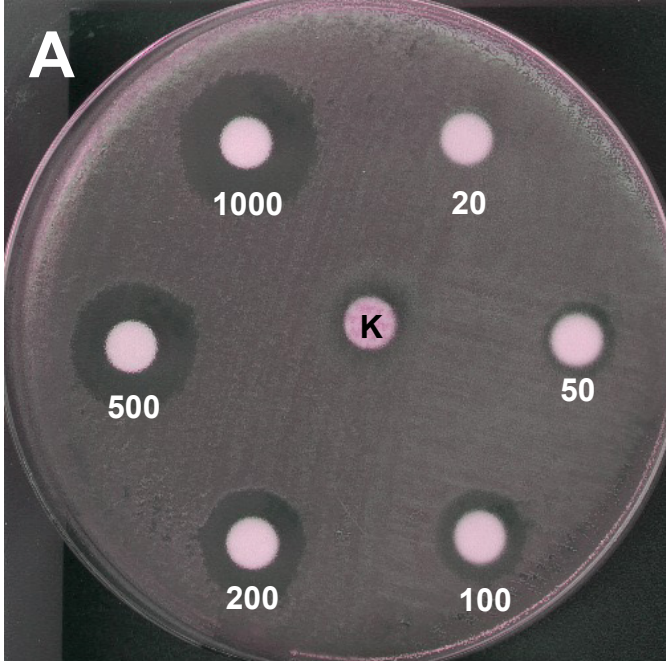

IMP = 0.01 mg/L

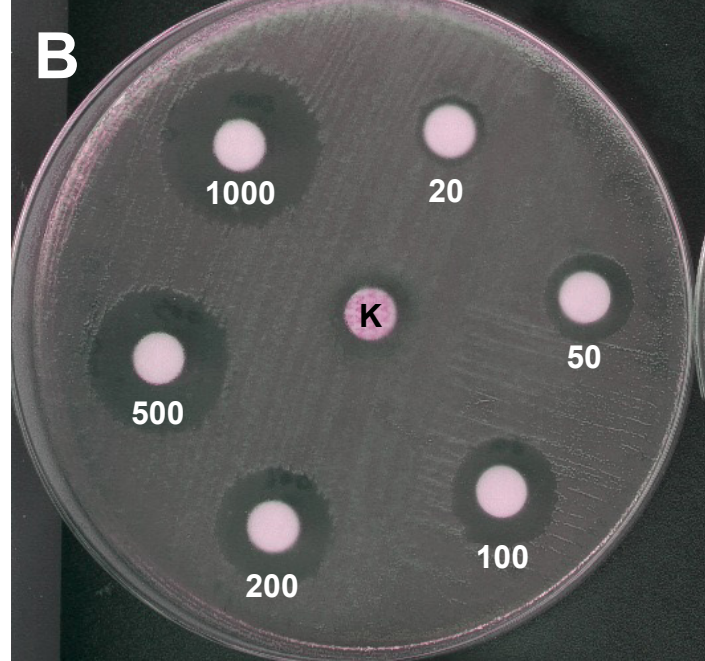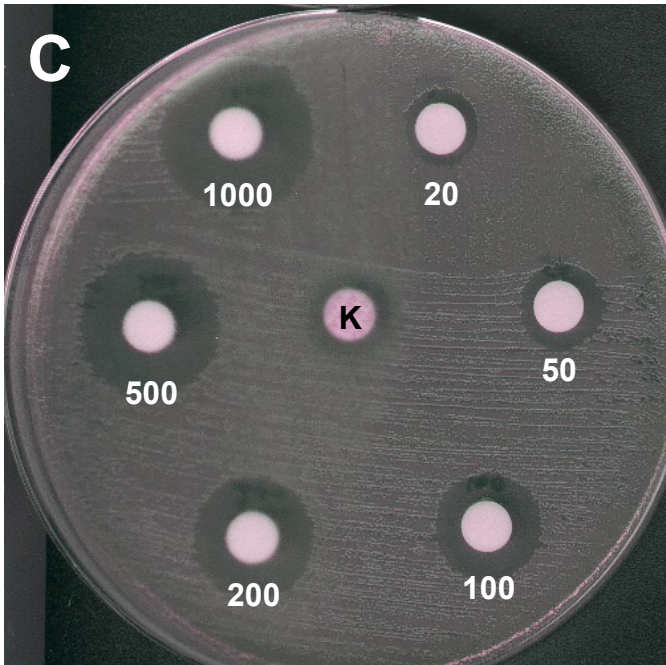

IMP = 0.1 mg/L

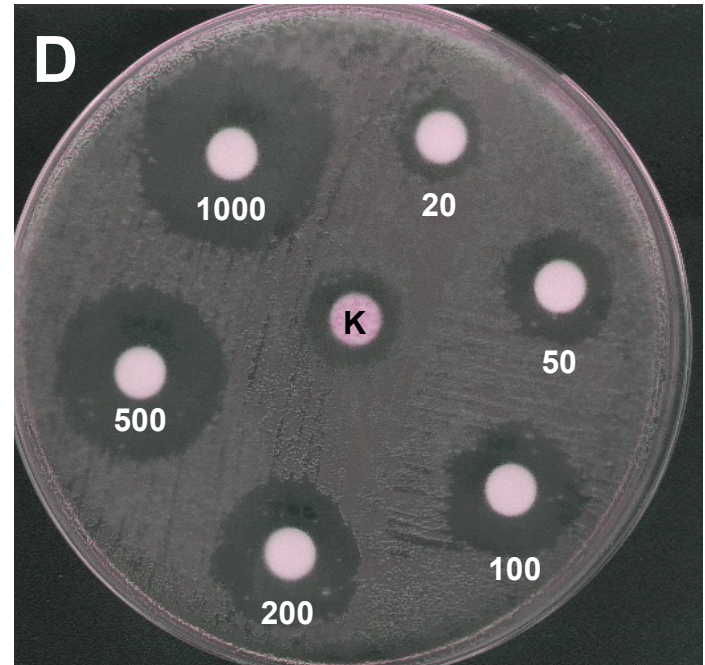

IMP = 1 mg/L

**Figure S1.** Zeocin susceptibility of the pCR2.1  $P_{\text{NDM-1}}\text{-bla}_{\text{NDM-1}}\text{-ble}_{\text{MBL}}$  *E. coli* TOP10 clone by disc diffusion method. White numbers (20, 50, 100, 200 and 1000) represent the quantity ( $\mu\text{g}$ ) of zeocin with which the discs have been impregnated. The pCR2.1  $P_{\text{NDM-1}}\text{-bla}_{\text{NDM-1}}\text{-ble}_{\text{MBL}}$  *E. coli* TOP10 clone was grown on Mueller-Hinton medium supplemented with imipenem at 0 (Panel A), 0.01 (Panel B), 0.1 (Panel C) and 1 mg/l (Panel D), respectively. K, Kanamycin at 30  $\mu\text{g}$  (antibiotic marker of the pCR2.1 plasmid).

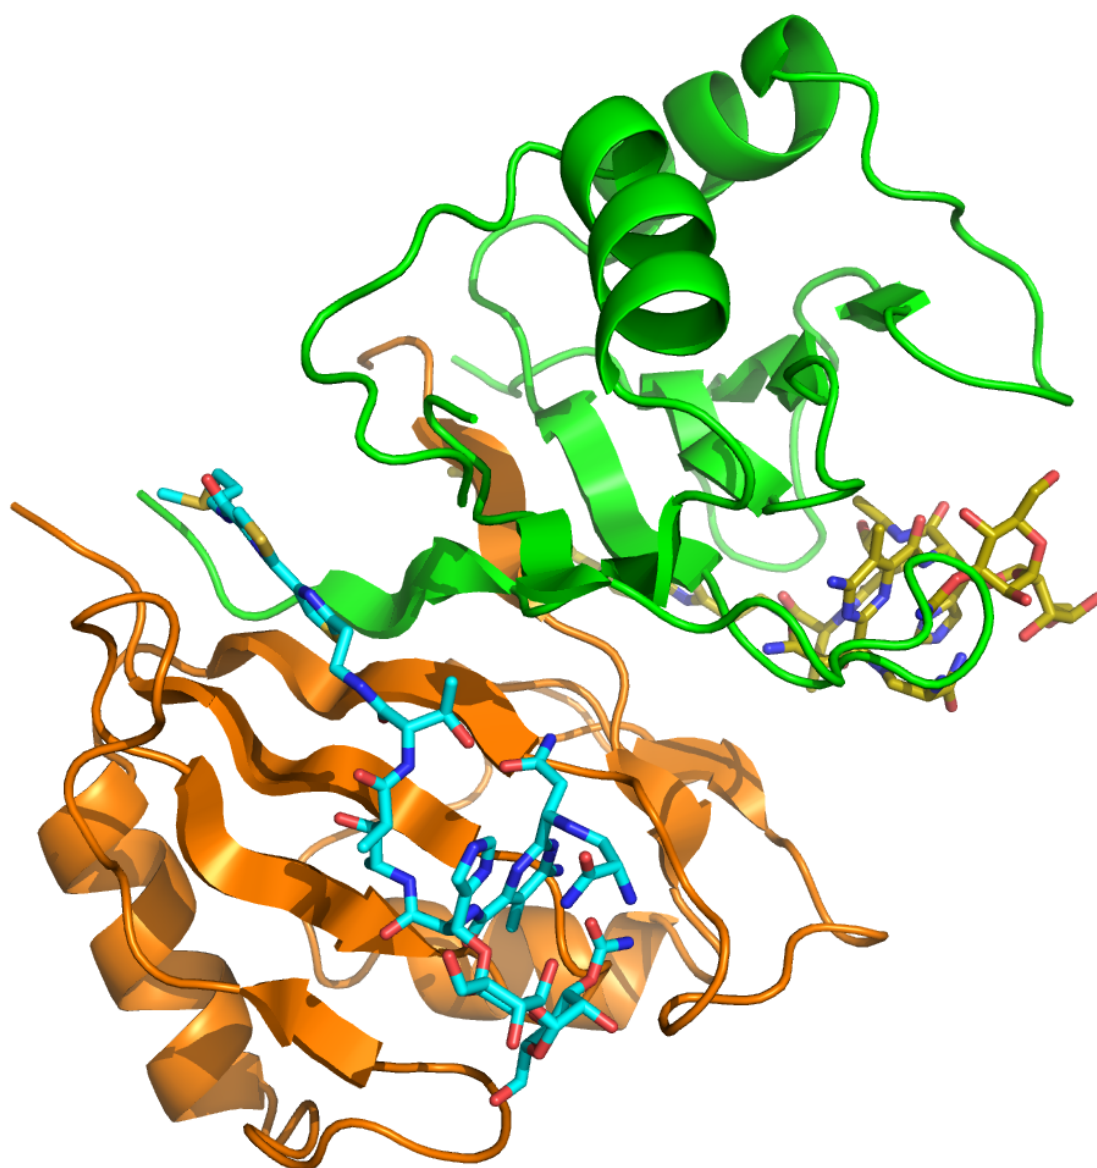

**Figure S2.** Secondary structure representation of the BRP<sub>MBL</sub> model in complex with two bleomycin molecules (stick representation). Chains A and B are colored in orange and green, and the corresponding bleomycin ligands in cyan and yellow, respectively.
